# Supplementary material for: A Normalized Tree Index for identification of correlated clinical parameters in microarray experiments
Source: Springer Nature journal article supplement (doi:10.1186/1756-0381-4-2), 2011-01-19
Supplement: 13040_2010_34_MOESM1_ESM.pdf [file 13040_2010_34_MOESM1_ESM.pdf]

clustering samples (b)

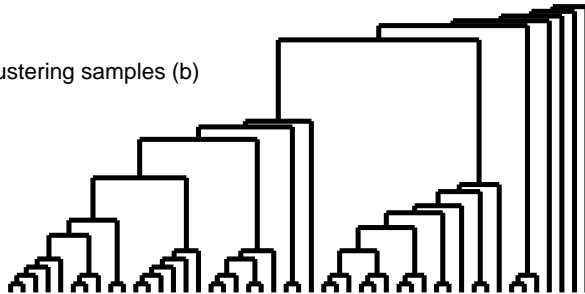

clinical data (d)

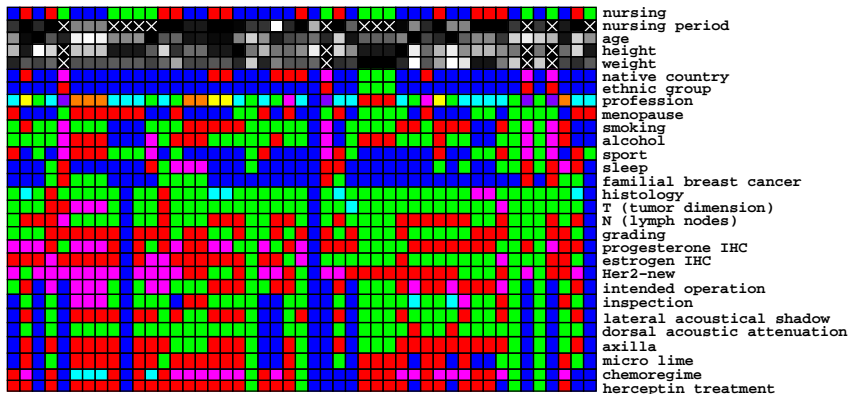

clustering genes (c)

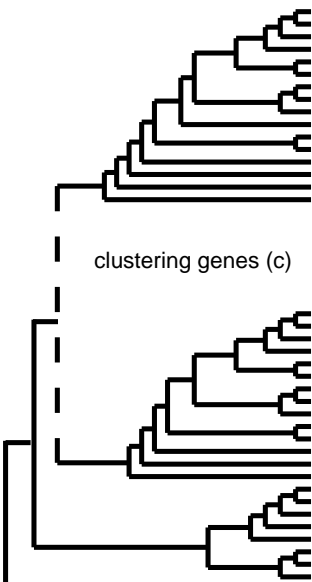

sample names

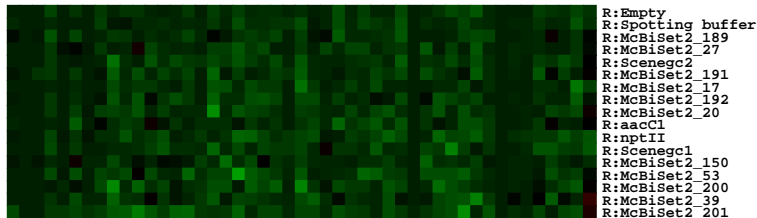

⋮

gene expression data (a)

⋮

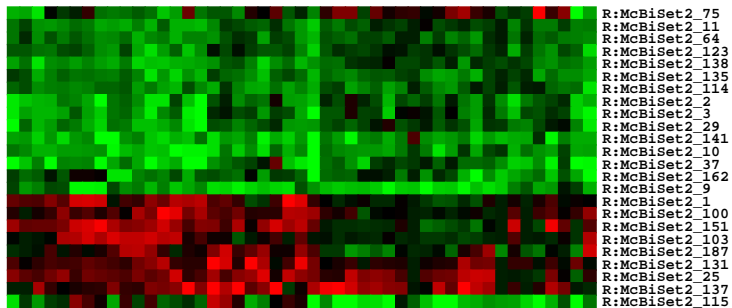

gene names

1086  
1094  
1098  
1082  
1088  
1050  
3  
10113  
10112  
10111  
10110  
10109  
10108  
10107  
10106  
10105  
10104  
10103  
10102  
10101  
10100  
10099  
10098  
10097  
10096  
10095  
10094  
10093  
10092  
10091  
10090  
10089  
10088  
10087  
10086  
10085  
10084  
10083  
10082  
10081  
10080  
10079  
10078  
10077  
10076  
10075  
10074  
10073  
10072  
10071  
10070  
10069  
10068  
10067  
10066  
10065  
10064  
10063  
10062  
10061  
10060  
10059  
10058  
10057  
10056  
10055  
10054  
10053  
10052  
10051  
10050  
10049  
10048  
10047  
10046  
10045  
10044  
10043  
10042  
10041  
10040  
10039  
10038  
10037  
10036  
10035  
10034  
10033  
10032  
10031  
10030  
10029  
10028  
10027  
10026  
10025  
10024  
10023  
10022  
10021  
10020  
10019  
10018  
10017  
10016  
10015  
10014  
10013  
10012  
10011  
10010  
10009  
10008  
10007  
10006  
10005  
10004  
10003  
10002  
10001
