# Supplementary material for: A Normalized Tree Index for identification of correlated clinical parameters in microarray experiments
Source: Springer Nature journal article supplement (doi:10.1186/1756-0381-4-2), 2011-01-19
Supplement: 13040_2010_34_MOESM3_ESM.pdf [file 13040_2010_34_MOESM3_ESM.pdf]

a) low correlation

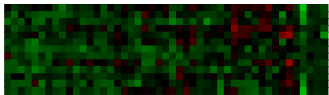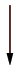

hierarchical agglomerative clustering

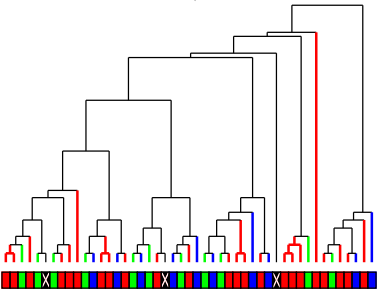

$TI = 0.77$

b) moderate correlation

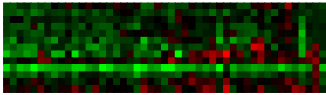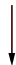

microarray data (primary data)

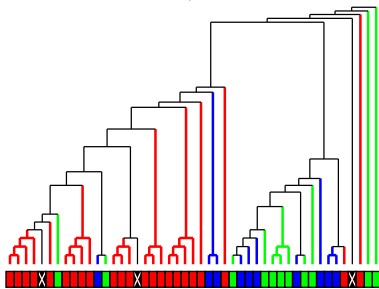

$TI = 2.07$

c) high correlation

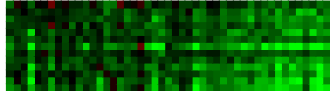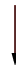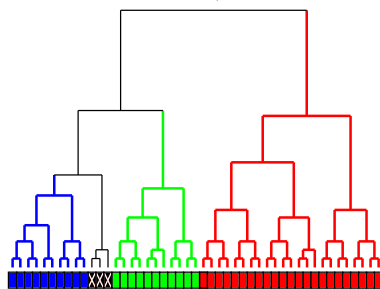

label

$TI = 4.59$
