# Supplementary material for: A Normalized Tree Index for identification of correlated clinical parameters in microarray experiments
Source: Springer Nature journal article supplement (doi:10.1186/1756-0381-4-2), 2011-01-19

a) cluster tree obtained by hierarchical agglomerative clustering

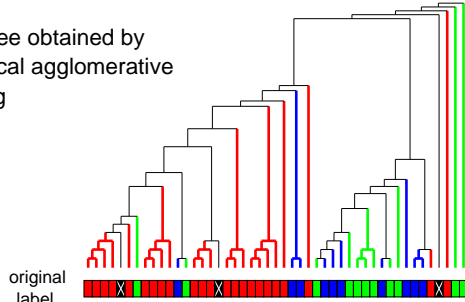

b) create cluster trees with randomly permuted labels

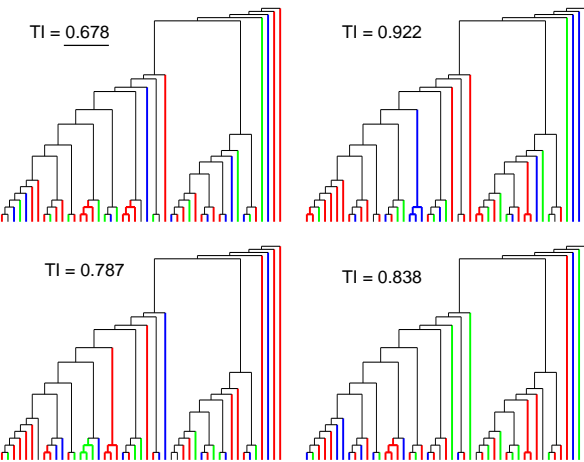

c) create ordered cluster trees

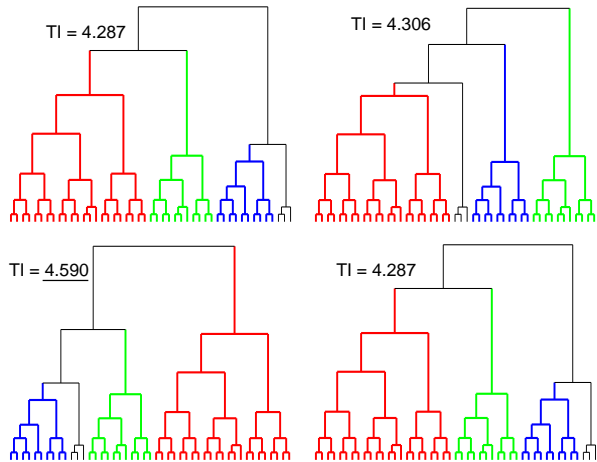

Supplement: 13040_2010_34_MOESM4_ESM.pdf [file 13040_2010_34_MOESM4_ESM.pdf]
